# Supplementary material for: Are ‘dual users’ who smoke and use e-cigarettes interested in using varenicline to stop smoking altogether, and can they benefit from it? A cohort study of UK vapers
Source: PubMed Central journal article supplement — BMJ Open. 2019 Mar 13;9(3):e026642. doi: 10.1136/bmjopen-2018-026642 (PMC6429907; doi:10.1136/bmjopen-2018-026642), 2019-03-13
Supplement: bmjopen-2018-026642.draft_revisions.pdf [file bmjopen-2018-026642.draft_revisions.pdf]

# BMJ Open

BMJ Open is committed to open peer review. As part of this commitment we make the peer review history of every article we publish publicly available.

When an article is published we post the peer reviewers' comments and the authors' responses online. We also post the versions of the paper that were used during peer review. These are the versions that the peer review comments apply to.

The versions of the paper that follow are the versions that were submitted during the peer review process. They are not the versions of record or the final published versions. They should not be cited or distributed as the published version of this manuscript.

BMJ Open is an open access journal and the full, final, typeset and author-corrected version of record of the manuscript is available on our site with no access controls, subscription charges or pay-per-view fees (<http://bmjopen.bmj.com>).

If you have any questions on BMJ Open's open peer review process please email [info.bmjopen@bmj.com](mailto:info.bmjopen@bmj.com)

# BMJ Open

## Are 'dual users' who smoke and use e-cigarettes interested in using varenicline to stop smoking altogether, and can they benefit from it?

|                               |                                                                                                                                                                                                                                                                                                                                                           |
|-------------------------------|-----------------------------------------------------------------------------------------------------------------------------------------------------------------------------------------------------------------------------------------------------------------------------------------------------------------------------------------------------------|
| Journal:                      | <i>BMJ Open</i>                                                                                                                                                                                                                                                                                                                                           |
| Manuscript ID                 | bmjopen-2018-026642                                                                                                                                                                                                                                                                                                                                       |
| Article Type:                 | Research                                                                                                                                                                                                                                                                                                                                                  |
| Date Submitted by the Author: | 12-Sep-2018                                                                                                                                                                                                                                                                                                                                               |
| Complete List of Authors:     | Hajek, Peter; Queen Mary University of London, Tobacco Dependence Research Unit<br>Peerbux, Sarrah; Queen Mary University of London<br>Phillips-Waller, Anna; Queen Mary University of London<br>Smith, Charlotte; Queen Mary University of London<br>Pittaccio, Kate; Queen Mary University of London<br>Przulj, Dunja; Queen Mary University of London, |
| Keywords:                     | vaping, varenicline, e-cigarettes, smoking cessation                                                                                                                                                                                                                                                                                                      |
|                               |                                                                                                                                                                                                                                                                                                                                                           |

SCHOLARONE™  
Manuscripts

Peer Review Only

1  
2  
3 **Are 'dual users' who smoke and use e-cigarettes interested in using**  
4 **varenicline to stop smoking altogether, and can they benefit from it?**  
5

6 Peter Hajek, Sarrah Peerbux, Anna Phillips-Waller, Charlotte Smith, Kate  
7 Pittaccio, Dunja Przulj\*  
8  
9

10 Health and Lifestyle Research Unit, Wolfson Institute of Preventive Medicine,  
11 Barts and The London School of Medicine and Dentistry, Queen Mary  
12 University of London, 2 Stayner's Road, London E1 4AH, UK  
13  
14

15 Peter Hajek Professor of Clinical Psychology  
16 Sarrah Peerbux Research Health Psychologist  
17 Anna Phillips-Waller Research Manager  
18 Charlotte Smith Research Health Psychologist  
19 Kate Pittaccio Research Health Psychologist  
20 Dunja Przulj, Post-doc Research Assistant  
21  
22

23  
24 \* Corresponding author  
25

26 d.przulj@qmul.ac.uk  
27  
28  
29  
30  
31  
32  
33  
34  
35  
36  
37  
38  
39  
40  
41  
42  
43  
44  
45  
46  
47  
48  
49  
50  
51  
52  
53  
54  
55  
56  
57  
58  
59  
60

## Abstract

**Objectives:** It is not known whether smokers who use e-cigarettes (EC), or 'dual users', are interested in stop-smoking medications and whether they can benefit from them.

**Design:** Cohort follow-up monitoring changes in smoking, EC use and nicotine intake. Participants were posted questionnaires and saliva kits at baseline, three and six months. Those interested in varenicline were posted the medication alongside telephone support for 12 weeks.

**Setting:** UK, nationwide.

**Participants:** Dual users smoking at least 10 cigarettes/day for more than one year before initiating EC use and using EC for at least 1 month; and using both EC and cigarette separately or concurrently for at least 3 days/week.

**Main outcome measure:** Self-reported abstinence from smoking for at least three months at the six month follow-up.

**Results:** Of 204 participants, 60.7% expressed interest in varenicline and 39.2% started varenicline (varenicline users, VU). VU were more dependent smokers ( $F=6.2$ ,  $p=0.01$ ) with higher cigarette consumption ( $F=8.7$ ,  $p<0.004$ ) using higher nicotine strength e-liquids ( $F=13.9$ ,  $p<0.001$ ) than varenicline non-users (VN). VU were more likely than VN to report abstinence from smoking at 6 months (17.5% vs 4.8%,  $p=0.006$ ,  $RR=3.6$ , 95%CI: 1.4-9.0), vaping (12.1% vs 1.6%,  $p=0.007$ ,  $RR=7.8$ , 95%CI: 1.7 to 34.5) and both smoking and vaping (10.0% vs 1.6%,  $p=0.02$ ,  $RR=6.2$ , 95%CI: 1.4-28.5). VU reported a greater reduction in enjoyment of vaping by the end of treatment ( $F=4.7$ ,  $p=0.03$ ) and recorded a greater reduction in nicotine intake than VN (for the whole sample at three months,  $F=13.9$ ,  $p<.001$ ; and for the whole sample and the subgroup of non-abstainers at six months,  $F=26.5$ ,  $p<.001$  and  $F=17.9$ ,  $p<.001$ , respectively).

**Conclusion:** Varenicline is likely to promote successful abstinence from both smoking and vaping. A randomised trial is needed to confirm this. Among dual users who want to stop smoking, there is a high level of interest in smoking-cessation treatments.

### Strengths and Limitations of the Study

- This study is the first to examine interest in varenicline among dual users and its effects on smoking and vaping
- The study collected objective measures of nicotine intake via salivary cotinine.
- The main limitation of the study is that it was not a randomized trial.
- The weekly support calls may have boosted the quit rate in the varenicline group

For peer review only

## Background

Smokers who use e-cigarettes (EC) do so mostly to stop or reduce smoking. Among US adult EC users, 85% used EC to stop smoking or reduce health risks of smoking (1). Some of the smokers who initiate EC use (vaping) stop smoking soon after starting to use e-cigarettes, others abandon vaping, and some use both EC and cigarettes for various periods of time (2, 3). In these 'dual users', EC seem to provide rewards that are sufficient to maintain vaping, but not sufficient to stop smoking.

Compared to smokers who switch to vaping completely, dual users were reported to have lower education and income (4) and to be more likely to have smoking peers (5). They recourse to cigarettes in stressful situations and when rapid nicotine uptake is required (6, 7), but also in hedonic situations (8). They also typically have a history of failed quit attempts (9). It seems likely that dual users tend to be more dependent smokers who wish to stop smoking, but are finding smoking cessation difficult.

As dual users are typically interested in stopping smoking altogether, the question arises as to whether they could benefit from using stop-smoking medications. No data exist on whether dual users are interested in stop-smoking treatments and on their reactions to them. The present study was set up to collect the first information on this topic.

We examined what proportion of dual users are interested in using varenicline, and what impact such treatment has on smoking and vaping behaviour and on nicotine intake. Separately from these objectives, the study is also monitoring changes in vaping and smoking in dual users over an extended period of time, together with attitudinal and other measures. These results will be reported separately.

## Methods

### Aims

To assess interest among dual users in using varenicline to stop smoking altogether and to monitor changes in smoking and vaping in those who did and those who did not opt for varenicline treatment.

### Study design

Cohort follow-up study.

### Participants

Participants were recruited via Facebook advertising and leaflets between November 2015 and January 2017. The patient information sheet explained

1  
2  
3 that some smokers who start to use e-cigarettes (EC) continue using  
4 conventional cigarettes (CC) as well and that little is known about the way  
5 such use develops over time. It is also not clear how many dual users  
6 succeed in stopping smoking altogether and what proportion is interested in  
7 receiving stop-smoking medication to do so. Dual users are being invited to  
8 take part in the study to clarify these issues.  
9

10  
11 Dual users were eligible to take part if they were aged 18 years and over;  
12 smoked at least 10 cigarettes a day for more than one year prior to initiating  
13 EC use; have been using EC for at least 1 month; were using both products  
14 (EC and CC) separately or concurrently for at least 3 days a week; and were  
15 interested in stopping smoking altogether.  
16  
17

### 18 **Procedures**

19 Potential participants were screened over the telephone or via e-mail. If  
20 eligible, they were posted study details and the consent form, together with  
21 the baseline questionnaire and saliva kit. When the study team received the  
22 questionnaire and saliva samples, those participants interested in receiving  
23 varenicline were screened by the clinic doctor to confirm that they could be  
24 provided with the medication. All participants interested in using varenicline  
25 were eligible to receive it. Participants were then called to confirm that they  
26 were still interested in using varenicline, and if they were, they were informed  
27 that the medication (the initial four-week supply) would be posted to them.  
28  
29

30  
31 They were asked to call the study team on receipt of the medication and  
32 before they started using it. At this call, they were guided in setting up their  
33 target quit day (TQD) 1-2 weeks later, and in starting to use the medication.  
34 They then received brief telephone calls weekly over the first six weeks,  
35 followed by three calls at fortnightly intervals. The content of the calls followed  
36 the standard practice of telephone support at the participating stop-smoking  
37 clinic, i.e. monitoring medication use and whether further supplies are needed,  
38 and providing motivational support. The calls also collected data on CC and  
39 EC use. Medication was posted as needed for up to three months.  
40  
41

42  
43 All participants (whether using varenicline or not) were contacted by  
44 telephone or e-mail at three and six 6 months. Saliva sampling kits and study  
45 questionnaires were posted to them with a request to call the study team  
46 when the materials were received. The package included £20 at baseline and  
47 £10 at three and six months as a compensation for participant's effort and  
48 time.  
49  
50

51  
52 Patients and/or the public have not been involved in this study thus far.  
53  
54  
55  
56  
57

### Stop-smoking medication

Varenicline was provided by the manufacturer Pfizer. The dosing was as per product labelling.

### Measures

The baseline questionnaire recorded demographic details, health status, smoking history and cigarette dependence assessed via Fagerstrom Test of Cigarette Dependence (FTCD) (10), vaping history and interest in using varenicline.

Participants who opted for varenicline were asked about their varenicline use (used as prescribed: Yes or No) and about their smoking and vaping each week.

At three and six months follow-ups, all participants were asked about average number of cigarettes smoked per day and EC cartridges or ml e-liquid used per day.

Participants who were still smoking and/or vaping were asked about their enjoyment of smoking and vaping, i.e. "How much do you enjoy smoking/vaping?" on a scale of 1-10 where 1=not at all and 10=extremely.

Salivary samples were collected at baseline and at three and six months, and assayed for cotinine and anabasine at ABS laboratories Ltd. UK.

Table 1 shows the schedule of assessments.

**Table 1: Schedule of assessments**

|                                   | Baseline | 3 M | 6M |
|-----------------------------------|----------|-----|----|
| <b>Measures/ procedures</b>       |          |     |    |
| Baseline questionnaire            | X        |     |    |
| Interest in receiving varenicline | X        |     |    |
| Salivary cotinine and anabasine   | X        | X   | X  |
| Smoking/vaping status/rate *      | X        | X   | X  |
| Enjoyment of smoking and vaping * | X        | X   | X  |

\*Measures collected also at each phone call with participants opting for treatment

### Sample size and data analysis

No data exist on the level of interest among dual users in receiving assistance in smoking cessation, or on the effects of varenicline in this population. We opted for recruiting at least 200 dual users to obtain key estimates with reasonable confidence intervals.



Changes in smoking and vaping variables, and differences between subgroups of participants who did and did not opt for varenicline treatment, were assessed using analysis of variance for continuously distributed endpoints and chi-square tests for categorical endpoints.

The primary outcome was self-reported abstinence from smoking for at least three months at the six months follow-up. We also assessed abstinence from vaping and from both smoking and vaping. As sensitivity analyses, we assessed self-reported abstinence over the previous one months and over the previous seven days. We did not include abstinence measures linked to a TQD because only the varenicline users were asked to set up a TQD. Participants lost to follow-up were included as non-abstainers.

The study was approved by the NHS Research Ethics Committee, England (reference number: 15/WM/0334).

## Results

We did not turn down responders who contacted us after the final advertising wave and recruited 204 participants in total. The participants flow is shown in Figure 1.

**Figure 1: Participant flow chart**

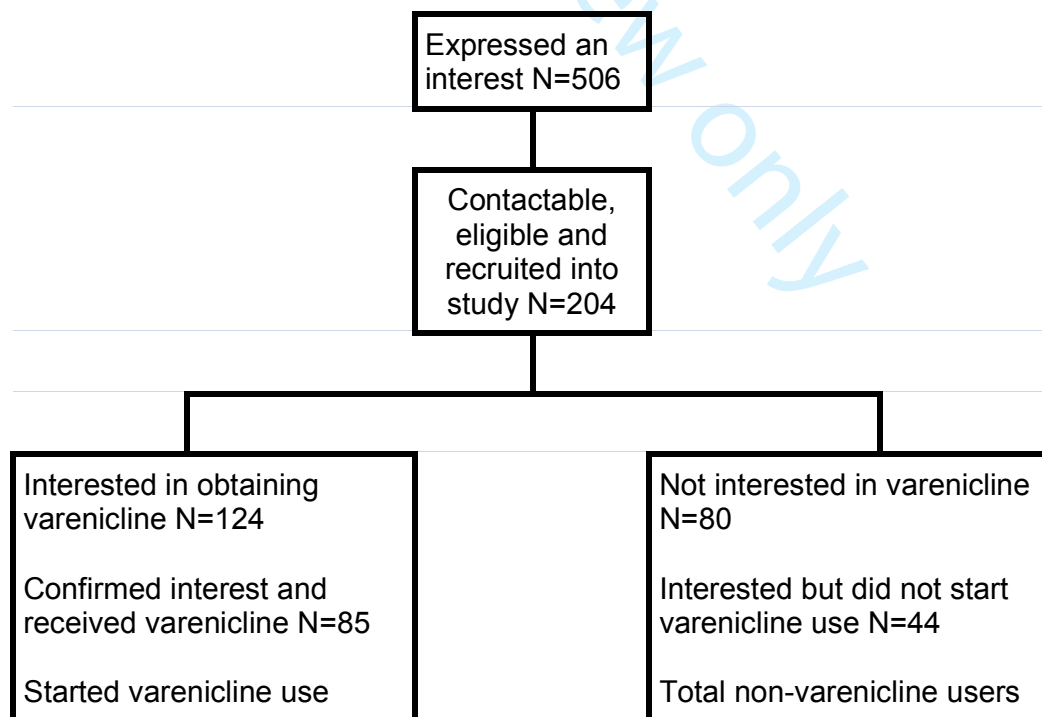

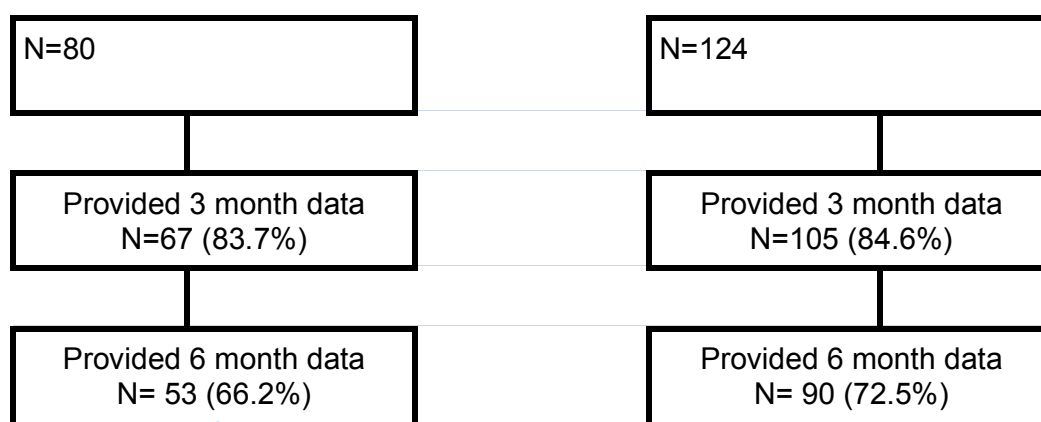

Of the 204 participants, 124 (61%) expressed an initial interest in receiving varenicline, 85 (42%) confirmed their interest and were sent the medication; and 80 (39%) started treatment. Of the five who received the medication but decided not to start using it, three were experiencing stressful events and felt this was not the right time to start stop-smoking treatment, one stopped smoking on their own in the meantime, and one lost the medications and later dropped out of the study.

Table 1 shows baseline characteristics of the subgroups that started and did not start varenicline use. Dual users who opted for varenicline were more dependent smokers with higher cigarette consumption who were using higher nicotine strength e-liquids.

**Table 1. Baseline characteristics of participants who did and did not use varenicline**

|                             | Used varenicline (N=80) | Did not use v. (N=124) | Difference                |
|-----------------------------|-------------------------|------------------------|---------------------------|
| Age (SD)                    | 33.6 (11.6)             | 30.4 (11.2)            | F=3.8, p=0.05             |
| % women                     | 28.7%                   | 30.6%                  | $\chi^2 = 0.08$<br>p=0.77 |
| % in full-time employment   | 72.5%                   | 75.0%                  | $\chi^2 = 0.01$<br>p=0.92 |
| FTCD (SD)                   | 4.9 (2.2)               | 4.1 (2.1)              | F=6.2, p=0.01             |
| Ethnicity (% white British) | 93.8%                   | 90.3%                  | $\chi^2 = 0.8$<br>p=0.39  |
| CPD (SD) now                | 11.6 (5.1)              | 9.2 (6.0)              | F=8.7, p<0.01             |
| CPD (SD) before             | 20.7 (10.1)             | 22.4 (8.6)             | F=1.7,                    |

|                                              |            |           |                          |
|----------------------------------------------|------------|-----------|--------------------------|
| starting to vape                             |            |           | p=0.20                   |
| Enjoyment of smoking(SD)                     | 6.2 (2.4)  | 6.1 (2.5) | F=0.09<br>p=0.77         |
| Enjoyment of vaping(SD)                      | 7.2 (2.3)  | 7.5 (2.3) | F=0.69<br>p=0.41         |
| Months of vaping 22(SD)                      | 18 (13.6)  | 22 (36.9) | F=1.01<br>p=0.32         |
| E-liquid nicotine concentration (mg/ml) (SD) | 13.9 (9.9) | 9.3 (7.4) | F=13.9,<br>p<0.001       |
| Using refillable EC (%)                      | 95.0%      | 91.9%     | $\chi^2 = 3.4$<br>p=0.19 |

CPD=Cigarettes per day

FTCD=Fagerstrom Test of Cigarette Dependence

Table 2 shows the proportions of participants who stopped smoking, vaping or both at each time point. Participants who used varenicline were more likely to stop smoking, stop vaping, or stop both at all time points.

**Table 2: Cessation of smoking and vaping in participants who did and did not use varenicline**

|                        | % (N)<br>Used v<br>(N=80) | % (N) Did<br>not use v<br>(N=124) | p-value, RR and 95%CI       |
|------------------------|---------------------------|-----------------------------------|-----------------------------|
| <b>Stopped smoking</b> |                           |                                   |                             |
| 3M – past 7 days       | 43.8%<br>(35)             | 8.9%<br>(11)                      | P<0.001, RR=4.9 [2.7,9.1]   |
| 3M – past 30 days      | 32.5%<br>(26)             | 5.6%<br>(7)                       | P<0.001,RR=5.8 [2.6,12.6]   |
| 6M – past 7 days       | 31.3%<br>(25)             | 10.5%<br>(13)                     | P<0.001, RR=3.0 [1.6, 5.5]  |
| 6M – past 90 days      | 17.5%<br>(14)             | 4.8%<br>(6)                       | P= 0.006, RR=3.6 [1.4,9.0]  |
| <b>Stopped vaping</b>  |                           |                                   |                             |
| 3M – past 7 days       | 23.8%<br>(19)             | 3.2%<br>(4)                       | P<0.001, RR=7.4 [2.6,20.9]  |
| 3M – past 30 days      | 18.7%<br>(15)             | 1.6%<br>(2)                       | P<0.001, RR=11.6[2.7,49.5]  |
| 6M – past 7 days       | 25%<br>(20)               | 3.2%<br>(4)                       | P<0.001, RR=10.3 [3.2,33.6] |
| 6M – past 90 days      | 12.1%<br>(10)             | 1.6%<br>(2)                       | P=0.007, RR=7.8 [1.7,34.5]  |

| <b>Stopped both</b> |               |             |                             |
|---------------------|---------------|-------------|-----------------------------|
| 3M – past 7 days    | 20.0%<br>(16) | 1.6%<br>(2) | P<0.001, RR=12.4 [3.0,52.5] |
| 3M – past 30 days   | 16.3%<br>(13) | 1.6%<br>(2) | P=0.002 RR=10.1 [2.3,43.5]  |
| 6M – past 7 days    | 16.3%<br>(13) | 1.6%<br>(2) | P=0.002, RR=10.1 [2.3,43.5] |
| 6M – past 90 days   | 10.0%<br>(8)  | 1.6%<br>(2) | P=0.02, RR=6.2 [1.4,28.5]   |

\* Primary outcome

M= Months

In the analysis above, 44 people who expressed interest in varenicline but did not start using it were included among non-users. To examine a possibility that this subsample may have been people less likely to modify their smoking and vaping, we conducted a sensitivity analysis with the 44 participants excluded. The results were virtually identical.

We were able to verify self-reports of abstinence in participants who claimed to have stopped both smoking and vaping via cotinine assays. There were four participants who failed validation at three months (3 in the varenicline group and one in no varenicline group) and one participant who failed validation at 6 months (varenicline group). Including participants who failed validation as non-abstainers did not change the results much (RR=6.2 to RR=20.2; p=0.02 to p<0.001).

Table 3 shows varenicline use among all participants who started the medication and among those who were abstinent from smoking at three months, by the end of the varenicline use period. Adherence to varenicline treatment was relatively high, with even some of the smokers who failed to quit completely continuing varenicline use for the full three months.

**Table 3: Adherence to varenicline treatment (N, %)**

| Week post-TQD | All v. users (N=80) | Quitters at three months* (N=26) | Non-quitters (N=54) |
|---------------|---------------------|----------------------------------|---------------------|
| 1             | 46 (57.5%)          | 22 (84.6%)                       | 24 (44.4%)          |
| 2             | 41 (51.2%)          | 20 (76.9%)                       | 21 (38.8%)          |
| 3             | 30 (37.5%)          | 16 (61.5%)                       | 14 (25.9%)          |
| 4             | 31 (38.7%)          | 15 (57.6%)                       | 16 (29.6%)          |
| 6             | 23 (28.7%)          | 15 (57.6%)                       | 8 (14.8%)           |
| 8             | 14 (17.5%)          | 8 (30.7%)                        | 6 (11.1%)           |

|    |            |           |          |
|----|------------|-----------|----------|
| 10 | 12 (15.0%) | 7 (26.9%) | 5 (9.2%) |
| 12 | 19 (24%)   | 9 (35%)   | 10 (19%) |

\*no smoking in last 30 days

TQD= Target Quit Day

Table 4 shows changes in enjoyment of vaping and smoking by the end of the varenicline use period at three months in participants who were still using their products and who provided the ratings. The varenicline group recorded bigger reductions in enjoyment of both smoking and vaping, but this only reached significance for reduced enjoyment of vaping.

**Table 4. Changes in enjoyment of smoking and vaping compared to baseline at three months in participants who still smoked/vaped**

|                                                                   | Used v             | Did not use v      | Difference       |
|-------------------------------------------------------------------|--------------------|--------------------|------------------|
| Mean difference in enjoyment of <i>vaping</i> from baseline (SD)  | -0.8 (2.2)<br>N=46 | -0.2 (1.5)<br>N=99 | F=4.7<br>p=0.032 |
| Mean difference in enjoyment of <i>smoking</i> from baseline (SD) | -1.3 (2.8)<br>N=28 | -0.5 (2.1)<br>N=90 | F=2.2<br>p=0.14  |

Table 5 shows changes in cotinine levels in the two groups. We obtained usable cotinine samples from 135 participants at 3M and 115 at 6M. Varenicline use was associated with a significant reduction in nicotine intake and the effect persisted at 6 months. Among the subsamples of participants who continued to smoke, the varenicline group reduced their nicotine intake at both time points while the other group increased it, although the difference was only significant at six months.

**Table 5. Change from baseline in cotinine levels (ng/ml) in participants who used and did not use varenicline**

|                         | 3M                       |                | All       | 6M                        |                | All       |
|-------------------------|--------------------------|----------------|-----------|---------------------------|----------------|-----------|
|                         | Abstainers from smoking* | Non-abstainers |           | Abstainers from smoking** | Non-abstainers |           |
| <i>Used varenicline</i> |                          |                |           |                           |                |           |
| Baseline (SD)           | 275 (107)                | 269 (132)      | 272 (121) | 261 (101)                 | 320 (132)      | 302 (125) |
| Follow-up (SD)          | 100 (145)                | 245 (202)      | 187 (194) | 90 (101)                  | 245 (176)      | 198 (172) |
| Difference              | -175                     | -24            | -85       | -171                      | -75            | -104      |

| (N)                                             | N=21             | N=30             | N=51              | N=13            | N=30              | N=43              |
|-------------------------------------------------|------------------|------------------|-------------------|-----------------|-------------------|-------------------|
| <i>Did not use varenicline</i>                  |                  |                  |                   |                 |                   |                   |
| Baseline (SD)                                   | 298 (153)        | 299 (171)        | 298 (168)         | 397 (174)       | 293 (181)         | 301 (180)         |
| Follow-up (SD)                                  | 257 (158)        | 325 (182)        | 319 (181)         | 300 (281)       | 327 (179)         | 324 (184)         |
| Difference                                      | -41              | +26              | +21               | -97             | +34               | +23               |
| (N)                                             | N=7              | N=77             | N=84              | N=5             | N=67              | N=72              |
| <i>Difference between v users and non-users</i> | F=3.4<br>P=0.076 | F=2.2<br>P=0.145 | F=13.9<br>p<0.001 | F=0.8<br>P=0.39 | F=17.9<br>P<0.001 | F=26.5<br>P<0.001 |

\*no smoking in last 30 days

\*\*no smoking in last 90 days

+/- indicates increase or decrease from baseline, respectively

We obtained usable anabasine samples from 126 participants at 3M and 109 at 6M, but salivary anabasine turned out not be a sensitive enough marker, with a very narrow range of very low values and a number of zero readings in participants who reported regular smoking (varenicline users and non-users had a drop in anabasine levels of 0.5 [SD=1.7] vs 0.3 [SD=1.8] ng/ml,  $p=0.51$  at 3M; and 0.3 [SD=2.6] vs 0.1 [SD=2.3] ng/ml,  $p=0.59$  at 6M).

## Discussion

A large proportion of dual users (61%) expressed interest in using varenicline to help them stop smoking altogether, with 39% starting treatment. Compared to the rest of the sample, dual users who used varenicline had much higher rates of quitting smoking as well as quitting vaping.

The substantial interest among dual users in using a stop smoking medication was unexpected. We assumed initially that because dual users opted for EC in preference to licensed medications (that are offered by the National Health Service and local stop-smoking services virtually free in the UK), that they would show limited interest in using them. The majority however were interested. Attempts at health behaviour changes are often characterised by gaps between intentions and actions and in this case, over a third of those who initially expressed interest did not progress to actual use. This however still left 39% of the sample initiating varenicline treatment.

Dual users who started varenicline treatment were heavier smokers with higher tobacco dependence who were using higher strength nicotine liquids

1  
2  
3 than the rest of the sample. It seems likely that this subsample was finding  
4 reducing or quitting smoking more difficult than the rest of the cohort, but they  
5 may have also been more motivated to do so. A randomised trial would be  
6 needed to control for such variables. It is possible that the effect of varenicline  
7 would be even stronger because the groups would be matched for  
8 dependence, but it could also be weaker if the current results were influenced  
9 by differences in motivation to quit smoking.  
10  
11

12  
13 The difference in quitting nicotine use between participants who did and those  
14 who did not use varenicline was remarkably large (RR=3.6 for stopping  
15 smoking; RR=7.8 for stopping vaping, and RR=6.2 for stopping both for at  
16 least the past three months at the six month follow-up).  
17  
18

19 It was hypothesized that one of the key moderators of the effect of varenicline  
20 on stopping smoking is its effect on reducing urges to smoke (11). We were  
21 unable to monitor withdrawal symptoms in non-varenicline users during the  
22 acute withdrawal phase, but we collected ratings of enjoyment of smoking and  
23 vaping at different time points. At the end of the varenicline use period at  
24 three months, the varenicline group was reporting a significantly greater  
25 reduction in enjoyment of vaping, while the difference in reduction of  
26 enjoyment of smoking did not reach statistical significance. The varenicline  
27 effect on vaping cessation also appeared stronger than its effect on cessation  
28 of smoking. The data tally with the previous findings suggesting that the  
29 medication exerts its influence in part at least by reducing the reward from  
30 nicotine.  
31  
32  
33  
34

35 This is further supported by the finding that varenicline use was associated  
36 with a reduction in nicotine intake, indexed by salivary cotinine, at all time  
37 points. An activity that generates less reward can be expected to subside. A  
38 recent trial of nicotine replacement 'preloading' (use of nicotine patches for  
39 four weeks while participants continue to smoke ad-lib) identified the reduction  
40 in urges to smoke before and after stopping smoking and a reduction in  
41 smoke intake as mediators of the treatment effect on abstinence (12). This  
42 tallies closely with the present findings.  
43  
44  
45

46 The finding that the varenicline group showed a reduction in nicotine intake in  
47 non-abstainers at six months is more difficult to interpret. The experience with  
48 varenicline may have had some kind of on-going impact that continued even  
49 after the medication ceased, but this could also be a chance finding.  
50  
51

52 The main limitation of the study is that this was not a randomised comparison.  
53 As discussed above, dual users opting for varenicline may have been more  
54 motivated to stop smoking than others, although interest in stopping smoking  
55 was the inclusion criterion. Participants in the varenicline group also received  
56  
57  
58  
59  
60



1  
2  
3 weekly support and this could have made them more likely to respond to  
4 follow-up calls and less likely to drop out than the rest of the sample. This  
5 however was not the case, the follow-up rates were in fact slightly higher in  
6 the non-varenicline group. The weekly support calls may have boosted the  
7 quit rate in the varenicline group, although telephone support on its own has  
8 been shown to have only modest long-term effects (13).  
9

10  
11 We were able to validate smoking status in people who claimed to have  
12 stopped both smoking and vaping via salivary cotinine, but salivary anabasine  
13 turned out not be an accurate enough measure. In dual users, nicotine and its  
14 metabolites cannot be used to verify abstinence from smoking, but future  
15 studies may consider using urinary index of exposure to tobacco-specific  
16 nitrosamine NNK for this purpose (14). With no biochemical confirmation of  
17 abstinence from smoking in EC users, the study relied on self-reports and this  
18 could have introduced a bias, although we did detect significant differences  
19 between the groups in cotinine levels.  
20  
21  
22  
23

24 Another possible source of bias that may have affected our results is that only  
25 the varenicline group set up a formal quit date. This would have a major  
26 influence on the usual indicators of sustained abstinence rates timed from the  
27 TQD because only one group was asked to quit on that day. The varenicline  
28 effect however was also present when looking at abstinence during months  
29 three to six, and also when looking at abstinence for just the past seven days  
30 at six months. In the sample of people intending to stop smoking, such  
31 measures that are not linked to an early quit date should be less vulnerable to  
32 any such effect. The issue of having or not having TQD could be also  
33 expected to have little impact on EC use because participants were not asked  
34 to stop or reduce vaping. The fact that varenicline use was associated with a  
35 similar effect size with regard to quitting vaping mitigates the concern.  
36  
37  
38  
39

40 In summary, varenicline offered to dual users is likely to promote successful  
41 abstinence from both smoking and vaping, although a randomised trial is  
42 needed to confirm the finding. Among dual users who intend to stop smoking  
43 altogether, there is a high level of interest in smoking cessation treatments.  
44  
45  
46  
47

#### 48 **Funding**

49 The work was supported by an investigator-initiated grant from Pfizer (grant  
50 number: WII97671). The funder had no involvement in the study design,  
51 conduct, or data analysis.  
52  
53  
54

#### 55 **Conflicts of interest**

56  
57  
58  
59  
60



1  
2  
3 All authors have completed the ICMJE uniform disclosure form at  
4 [http://www.icmje.org/coi\\_disclosure.pdf](http://www.icmje.org/coi_disclosure.pdf) and declare: support from Pfizer for  
5 the work; no financial relationships with any organisations that might have an  
6 interest in the submitted work in the previous three years; and other  
7 relationships or activities that could appear to have influenced the submitted  
8 work (PH has provided consultancy to manufacturers of stop-smoking  
9 medications).

### 11 **Contributions**

12 All authors contributed to the planning and conduct of the work, and DP, PH,  
13 KP and SP contributed to the reporting of the work. PH and DP are  
14 responsible for the overall content as guarantors. The guarantors accept full  
15 responsibility for the work and/or the conduct of the study, had access to the  
16 data, and controlled the decision to publish. The corresponding author attests  
17 that all listed authors meet authorship criteria and that no others meeting the  
18 criteria have been omitted.

### 22 **Data Sharing**

23 Data is available upon request from the corresponding author.

### 26 **References**

- 29 1. Patel D, Davis KC, Cox S, Bradfield B, King BA, Shafer P, et al.  
30 Reasons for current E-cigarette use among US adults. *Preventive medicine*.  
31 2016;93:14-20.
- 32 2. Etter JF. Electronic cigarettes: a survey of users. *BMC Public Health*.  
33 2010;10:231.
- 34 3. Etter JF, Bullen C. Electronic cigarette: users profile, utilization,  
35 satisfaction and perceived efficacy. *Addiction*. 2011;106(11):2017-28.
- 36 4. Schoren C, Hummel K, Vries Hd. Electronic cigarette use: comparing  
37 smokers, vapers, and dual users on characteristics and motivational factors.  
38 *Tobacco Prevention & Cessation*. 2017;3(April).
- 39 5. Cooper M, Case KR, Loukas A, Creamer MR, Perry CL. E-cigarette  
40 dual users, exclusive users and perceptions of tobacco products. *American*  
41 *journal of health behavior*. 2016;40(1):108-16.
- 42 6. Adriaens K, Van Gucht D, Baeyens F. Differences between Dual Users  
43 and Switchers Center around Vaping Behavior and Its Experiences Rather  
44 than Beliefs and Attitudes. *International journal of environmental research and*  
45 *public health*. 2017;15(1):12.
- 46 7. Pokhrel P, Herzog TA, Muranaka N, Regmi S, Fagan P. Contexts of  
47 cigarette and e-cigarette use among dual users: a qualitative study. *BMC*  
48 *public health*. 2015;15(1):859.
- 49 8. Rass O, Pacek LR, Johnson PS, Johnson MW. Characterizing use  
50 patterns and perceptions of relative harm in dual users of electronic and  
51 tobacco cigarettes. *Experimental and clinical psychopharmacology*.  
52 2015;23(6):494.

- 1
- 2
- 3 9. Maglia M, Caponnetto P, Di Piazza J, La Torre D, Polosa R. Dual use
- 4 of electronic cigarettes and classic cigarettes: a systematic review. *Addiction*
- 5 *Research & Theory*. 2017:1-9.
- 6 10. Fagerström K. Determinants of tobacco use and renaming the FTND to
- 7 the Fagerström Test for Cigarette Dependence. *Nicotine & Tobacco*
- 8 *Research*. 2011;14(1):75-8.
- 9 11. Hajek P, McRobbie HJ, Myers KE, Stapleton J, Dhanji A-R. Use of
- 10 varenicline for 4 weeks before quitting smoking: decrease in ad lib smoking
- 11 and increase in smoking cessation rates. *Archives of internal medicine*.
- 12 2011;171(8):770-7.
- 13 12. The Preloading Investigators. Effects on abstinence of nicotine patch
- 14 treatment before quitting smoking: parallel, two arm, pragmatic randomised
- 15 trial. *Bmj*. 2018;361:k2164.
- 16 13. Stead LF, Perera R, Lancaster T. Telephone counselling for smoking
- 17 cessation. *Cochrane Database Syst Rev*. 2006;3(3).
- 18 14. Goniewicz ML, Smith DM. Are Some E-Cigarette Users “Blowing
- 19 Smoke”? Assessing the Accuracy of Self-Reported Smoking Abstinence in
- 20 Exclusive E-Cigarette Users. *Nicotine & Tobacco Research*. 2018:nty085-nty.
- 21
- 22
- 23
- 24
- 25
- 26
- 27
- 28
- 29
- 30
- 31
- 32
- 33
- 34
- 35
- 36
- 37
- 38
- 39
- 40
- 41
- 42
- 43
- 44
- 45
- 46
- 47
- 48
- 49
- 50
- 51
- 52
- 53
- 54
- 55
- 56
- 57
- 58
- 59
- 60

# BMJ Open

**Are 'dual users' who smoke and use e-cigarettes interested in using varenicline to stop smoking altogether, and can they benefit from it? A cohort study of UK vapers.**

|                                 |                                                                                                                                                                                                                                                                                                                                                           |
|---------------------------------|-----------------------------------------------------------------------------------------------------------------------------------------------------------------------------------------------------------------------------------------------------------------------------------------------------------------------------------------------------------|
| Journal:                        | <i>BMJ Open</i>                                                                                                                                                                                                                                                                                                                                           |
| Manuscript ID                   | bmjopen-2018-026642.R1                                                                                                                                                                                                                                                                                                                                    |
| Article Type:                   | Research                                                                                                                                                                                                                                                                                                                                                  |
| Date Submitted by the Author:   | 21-Jan-2019                                                                                                                                                                                                                                                                                                                                               |
| Complete List of Authors:       | Hajek, Peter; Queen Mary University of London, Tobacco Dependence Research Unit<br>Peerbux, Sarrah; Queen Mary University of London<br>Phillips-Waller, Anna; Queen Mary University of London<br>Smith, Charlotte; Queen Mary University of London<br>Pittaccio, Kate; Queen Mary University of London<br>Przulj, Dunja; Queen Mary University of London, |
| <b>Primary Subject Heading</b>: | Smoking and tobacco                                                                                                                                                                                                                                                                                                                                       |
| Secondary Subject Heading:      | Addiction, Public health                                                                                                                                                                                                                                                                                                                                  |
| Keywords:                       | vaping, varenicline, e-cigarettes, smoking cessation                                                                                                                                                                                                                                                                                                      |
|                                 |                                                                                                                                                                                                                                                                                                                                                           |

SCHOLARONE™  
Manuscripts

1  
2  
3 **Are 'dual users' who smoke and use e-cigarettes interested in using**  
4 **varenicline to stop smoking altogether, and can they benefit from it? A**  
5 **cohort study of UK vapers.**  
6  
7

8 Peter Hajek<sup>1</sup>, Sarrah Peerbux<sup>1</sup>, Anna Phillips-Waller<sup>1</sup>, Charlotte Smith<sup>1</sup>, Kate  
9 Pittaccio<sup>1</sup>, Dunja Przulj<sup>1\*</sup>

10  
11  
12 \* Corresponding author  
13 d.przulj@qmul.ac.uk  
14  
15

16 <sup>1</sup>Health and Lifestyle Research Unit  
17 Wolfson Institute of Preventive Medicine  
18 Barts and The London School of Medicine and Dentistry  
19 Queen Mary University of London  
20 2 Stayner's Road  
21 London E1 4AH  
22 UK  
23  
24  
25  
26  
27  
28  
29

30 **Acknowledgements**

31 The study was funded by an investigator-initiated grant from Pfizer. The  
32 funder had no involvement in the study design, conduct, or data analysis.  
33  
34  
35  
36  
37  
38  
39  
40  
41  
42  
43  
44  
45  
46  
47  
48  
49  
50  
51  
52  
53  
54  
55  
56  
57  
58  
59  
60

## Abstract

**Objectives:** Smokers who use e-cigarettes (EC) do so mostly to stop smoking, but many continue to use both products. It is not known whether these 'dual-users' are interested in stop-smoking medications and whether they can benefit from them.

**Setting, participants and measures:** Dual-users were recruited over social media and posted study questionnaire and saliva kits at baseline, three and six months. Those interested in varenicline were posted the medication and received weekly calls over the first six weeks, followed by three calls at fortnightly intervals.

**Results:** Of 204 participants, 124 (60.7%, CI= 54%-68%) expressed interest in receiving varenicline and 80 (39.2%, CI=32%-45%) started varenicline (varenicline users, VU). VU were more dependent smokers ( $F=6.2$ ,  $p=0.01$ ) with higher cigarette consumption ( $F=8.7$ ,  $p<0.004$ ) who were using stronger nicotine e-liquids ( $F=13.9$ ,  $p<0.001$ ) than dual-users not opting for varenicline (varenicline non-users, VN). In terms of abstinence for at least three months at the six-month follow-up, VU were more likely than VN to report abstinence from smoking (17.5% vs 4.8%,  $p=0.006$ , RR=3.6, CI:1.4-9.0), vaping (12.1% vs 1.6%,  $p=0.007$ , RR=7.8, CI:1.7-34.5) and both smoking and vaping (8.8% vs 0.8%,  $p=0.02$ , RR=10.9, CI:1.4-86.6). The differences were significant across sensitivity analyses (RRs=4.9 to 14.0;  $p=0.01$  to  $p<0.001$  at three months; RRs=3.0 to 14.0;  $p=0.01$  to  $p<0.001$  at six months). VU reported a greater reduction in enjoyment of vaping by the end of the varenicline use period ( $F=4.1$ ,  $p=0.04$ ) and recorded a significantly greater reduction in nicotine intake than VN at three months, ( $F=13.9$ ,  $p<.001$ ) and six months, ( $F=26.5$ ,  $p<.001$ ).

**Conclusion:** Varenicline offered to dual-users is likely to promote successful abstinence from both smoking and vaping, although a randomised trial is needed to confirm this. Among dual-users who want to stop smoking, there seems to be a high level of interest in smoking-cessation treatments.

## Article Summary

### Strengths and Limitations of this study:

- The main strength is that this was the first study of this kind and provides new insights into dual users' interest in stop-smoking treatment and its effects.
- The main limitation is that this was not a randomised comparison.
- Recruitment via social media may have attracted a sample with characteristics that are not representative of the wider population of dual users and the generalisability of the results is thus unclear.

For peer review only

## Background

Smokers who use e-cigarettes (EC) do so mostly to stop or reduce smoking. E.g. among US adult EC users, 85% used EC to stop smoking or reduce health risks of smoking (1). Some of the smokers who initiate EC use (vaping) stop smoking soon after starting to use EC, others abandon vaping, and some use both EC and cigarettes for various periods of time (2, 3). In these 'dual users', EC seem to provide rewards that are sufficient to maintain vaping, but not sufficient to stop smoking.

Compared to smokers who switch to vaping completely, dual users were reported to have lower education and income (4) and to be more likely to have smoking peers (5). They recourse to cigarettes in stressful situations and when rapid nicotine uptake is required (6, 7), but also in hedonic situations (8). They also typically have a history of failed quit attempts (9). It seems likely that dual users tend to be more dependent smokers who wish to stop smoking, but are finding smoking cessation difficult.

As dual users are typically interested in stopping smoking altogether, a question arises whether they could benefit from using stop-smoking medications. No data exist on whether dual users are interested in stop-smoking treatments and on their reactions to them. The present study was set up to collect the first information on this topic.

In this exploratory study, we examined what proportion of dual users are interested in using varenicline, and what impact such treatment has on smoking and vaping behaviour and on nicotine intake. Separately from these objectives, the study is also monitoring changes in vaping and smoking in dual users over an extended period of time, together with attitudinal and other measures. These results will be reported separately.

## Methods

### Aims

To assess interest among dual users in using varenicline to stop smoking altogether and to monitor changes in smoking and vaping in those who did and those who did not opt for varenicline treatment.

### Study design

Cohort follow-up study.

### Participants

Participants were recruited via Facebook advertising and leaflets between November 2015 and January 2017. The patient information sheet explained

1  
2  
3 that some smokers who start to use e-cigarettes (EC) continue using  
4 conventional cigarettes (CC) as well and that little is known about the way  
5 such use develops over time. It is also not clear how many dual users  
6 succeed in stopping smoking altogether and what proportion is interested in  
7 receiving stop-smoking medication to do so. Dual users are being invited to  
8 take part in the study to clarify these issues.  
9  
10

11  
12 Dual users were eligible if they smoked at least 10 cigarettes a day for more  
13 than one year prior to initiating EC use; have been using EC for at least 1  
14 month; were using both products (EC and CC) separately or concurrently for  
15 at least 3 days a week; and were interested in stopping smoking altogether.  
16  
17  
18

### 19 **Procedures**

20 Potential participants were screened over the telephone or e-mail. If eligible,  
21 they were posted study details and the consent form, together with the  
22 baseline questionnaire and saliva kit. When the study team received the  
23 questionnaire and saliva samples, the medical record part of the  
24 questionnaire of participants interested in receiving varenicline was screened  
25 to confirm that they can be provided with the medication. All participants  
26 interested in using varenicline were eligible for receiving it. The participants  
27 were then called to confirm that they remain interested in using the medication  
28 and if they were, they were informed that the medication (the initial four-week  
29 supply) is being posted to them; and they were asked to call the study team  
30 on receipt of the medication and before they started using it.  
31  
32  
33  
34  
35

36 When participants received the medication and called back, they were guided  
37 in setting up their target quit day (TQD) 1-2 weeks later and in starting to use  
38 the medication. They then received brief telephone calls weekly over the first  
39 six weeks, followed by three calls at fortnightly intervals. The content of the  
40 calls followed the standard practice of telephone support at the participating  
41 stop-smoking clinic, i.e. monitoring medication use and whether further  
42 supplies are needed, and providing motivational support. The calls also  
43 collected data on CC and EC use. Medication was posted as needed for up to  
44 three months. Participant up-titrated varenicline use from ½ mg per day for  
45 three days through ½ mg twice per day for the rest of the first week and to  
46 1mg twice a day for the rest of the course, as per product labelling.  
47  
48  
49  
50  
51

52 All participants (whether asking for varenicline or not) were contacted by  
53 telephone or e-mail at three and six months. Saliva sampling kits and study  
54 questionnaires were posted to them with a request to call the study team  
55 when the materials were received. The package included £20 at baseline and  
56 £10 at three and six months as a compensation for participant's effort and  
57 time.  
58  
59  
60



## Stop-smoking medication

Varenicline was provided by the manufacturer Pfizer. The dosing was as per product labelling.

## Measures

The baseline questionnaire recorded demographic details, health status, smoking history and cigarette dependence assessed via Fagerstrom Test of Cigarette Dependence (FTCD) (10), vaping history and interest in using varenicline.

Participants who opted for varenicline were asked about their varenicline use (used as prescribed: Yes or No) and about their smoking and vaping each week.

At three and six month follow-ups, all participants were asked about average number of cigarettes smoked per day and EC cartridges or ml e-liquid used per day.

Participants who were still smoking and/or vaping were asked about their enjoyment of smoking and vaping, i.e. "How much do you enjoy smoking/vaping?" on a scale of 1-10 where 1=not at all and 10=extremely.

Salivary samples were collected at baseline and at three and six month follow ups and assayed for cotinine and anabasine at ABS laboratories Ltd. UK.

Table 1 shows the schedule of assessments.

**Table 1: Schedule of assessments**

|                                   | Baseline | 3 M | 6M |
|-----------------------------------|----------|-----|----|
| <b>Measures/ procedures</b>       |          |     |    |
| Baseline questionnaire            | X        |     |    |
| Interest in receiving varenicline | X        |     |    |
| Salivary cotinine and anabasine   | X        | X   | X  |
| Smoking/vaping status/rate *      | X        | X   | X  |
| Enjoyment of smoking and vaping * | X        | X   | X  |

\*Measures collected also at each phone call with participants opting for treatment

## Sample size and data analysis

No data exist on the level of interest among dual users in receiving assistance in smoking cessation, or on the effects of varenicline in this population. We opted for recruiting at least 200 dual users to obtain key estimates with reasonable confidence intervals. For instance, if 10% of the respondents

would be interested in using varenicline, this sample size would provide 95% probability of the true population proportion falling within the range of 5.8% to 14.1%.

Changes in smoking and vaping variables, and differences between subgroups of participants who did and did not opt for varenicline treatment, were assessed using analysis of variance for continuously distributed endpoints and chi-square tests for categorical endpoints. Risk Ratios and 95% confidence intervals were also calculated for abstinence outcomes.

The primary outcome was self-reported abstinence from smoking (not a single puff) for at least three months at the six months follow-up. We also assessed abstinence from vaping and from both smoking and vaping. As sensitivity analyses, we assessed self-reported abstinence over the previous month and over the previous seven days. We did not include abstinence measures linked to a TQD because only the varenicline users were asked to set up a TQD. Participants lost to follow-up were included as non-abstainers. Missing data for other variables were not imputed.

### **Patient and public involvement**

The study was informed by discussions with participants at our previous trials and with patients attending our clinics.

The study was approved by the NHS Research Ethics Committee, England (reference number: 15/WM/0334).

### **Results**

We did not turn down responders who contacted us after the final advertising wave and recruited 204 participants in total. The participants flow is shown in Figure 1.

#### **Figure 1: Participant flow chart**

Of the 204 participants, 124 (61%; 95% CI= 54%-68%) expressed the initial interest in receiving varenicline, 85 (42%; 95%CI=35%-48%) were reached (by text, phone or e-mail), confirmed their interest and were sent the medication; and 80 (39%; 95% CI=32%-45%) started treatment. Of the five who received the medication but decided not to start using it, three were experiencing stressful events and felt this was not the right time to start stop smoking treatment, one stopped smoking on their own in the meantime, and one lost the medications and later dropped out of the study.

Table 2 shows baseline characteristics of the subgroups that started and did not start varenicline use. Dual users who opted for varenicline were more dependent smokers with higher cigarette consumption who were using higher nicotine strength e-liquids.

**Table 2. Baseline characteristics of participants who did and did not use varenicline**

|                                              | Used varenicline (N=80) | Did not use v. (N=124) | Difference                |
|----------------------------------------------|-------------------------|------------------------|---------------------------|
| Age (SD)                                     | 33.6 (11.6)             | 30.4 (11.2)            | F=3.8, p=0.05             |
| % women                                      | 28.7%                   | 30.6%                  | $\chi^2 = 0.08$<br>p=0.77 |
| % in full-time employment                    | 72.5%                   | 75.0%                  | $\chi^2 = 0.01$<br>p=0.92 |
| FTCD (SD)                                    | 4.9 (2.2)               | 4.1 (2.1)              | F=6.2, p=0.01             |
| Ethnicity (% white British)                  | 93.8%                   | 90.3%                  | $\chi^2 = 0.8$<br>p=0.39  |
| CPD (SD) now                                 | 11.6 (5.1)              | 9.2 (6.0)              | F=8.7, p<0.01             |
| CPD (SD) before starting to vape             | 20.7 (10.1)             | 22.4 (8.6)             | F=1.7, p=0.20             |
| Enjoyment of Smoking (SD)                    | 6.2 (2.4)               | 6.1 (2.5)              | F=0.09<br>p=0.77          |
| Enjoyment of vaping (SD)                     | 7.2 (2.3)               | 7.5 (2.3)              | F=0.69<br>p=0.41          |
| Months of vaping (SD)                        | 18 (13.6)               | 22 (36.9)              | F=1.01<br>p=0.32          |
| E-liquid nicotine concentration (mg/ml) (SD) | 13.9 (9.9)              | 9.3 (7.4)              | F=13.9, p<0.001           |
| Using refillable EC (%)                      | 95.0%                   | 91.9%                  | $\chi^2 = 3.4$<br>p=0.19  |

CPD=Cigarettes per day

FTCD=Fagerstrom Test of Cigarette Dependence

Table 3 shows the proportions of participants who stopped smoking, vaping or both at each time point. Participants who used varenicline were more likely to stop smoking, stop vaping, or stop both at all time points.

**Table 3: Cessation of smoking and vaping in participants who did and did not use varenicline**

|                        | Used v<br>(N=80) | Did not use v<br>(N=124) | p-value, RR and 95%CI       |
|------------------------|------------------|--------------------------|-----------------------------|
| <b>Stopped smoking</b> |                  |                          |                             |
| 3M – past 7 days       | 43.8%<br>(35)    | 8.9%<br>(11)             | p<0.001, RR=4.9 [2.7,9.1]   |
| 3M – past 30 days      | 32.5%<br>(26)    | 5.6%<br>(7)              | p<0.001,RR=5.8 [2.6,12.6]   |
| 6M – past 7 days       | 31.3%<br>(25)    | 10.5%<br>(13)            | p<0.001, RR=3.0 [1.6, 5.5]  |
| 6M – past 90 days      | 17.5%<br>(14)    | 4.8%<br>(6)              | p= 0.006, RR=3.6 [1.4,9.0]  |
| <b>Stopped vaping</b>  |                  |                          |                             |
| 3M – past 7 days       | 23.8%<br>(19)    | 3.2%<br>(4)              | p<0.001, RR=7.4 [2.6,20.9]  |
| 3M – past 30 days      | 18.7%<br>(15)    | 1.6%<br>(2)              | p<0.001, RR=11.6 [2.7,49.5] |
| 6M – past 7 days       | 25%<br>(20)      | 3.2%<br>(4)              | p<0.001, RR=10.3 [3.2,33.6] |
| 6M – past 90 days      | 12.1%<br>(10)    | 1.6%<br>(2)              | p=0.007, RR=7.8 [1.7,34.5]  |
| <b>Stopped both **</b> |                  |                          |                             |
| 3M – past 7 days       | 11.3%<br>(9)     | 0.8%<br>(1)              | p=0.01, RR=14.0 [1.8,108.1] |
| 3M – past 30 days      | 8.8%<br>(7)      | 0.8%<br>(1)              | p=0.02 RR=10.9 [1.4,86.6]   |
| 6M – past 7 days       | 11.3%<br>(9)     | 0.8%<br>(1)              | p=0.01, RR=14.0 [1.8,108.1] |
| 6M – past 90 days      | 8.8%<br>(7)      | 0.8%<br>(1)              | p=0.02, RR=10.9 [1.4,86.6]  |

\* Primary outcome

\*\* Only participants who passed cotinine validation are included

In the analysis above, 44 people who expressed interest in varenicline but did not start using it were included among non-users. To examine a possibility that this subsample may have been people less likely to modify their smoking and vaping, we conducted a sensitivity analysis with the 44 participants excluded. The results were virtually identical.

We were able to verify self-reports of abstinence in participants who claimed to have stopped both smoking and vaping via cotinine assays (see Table 3).

Including participants who failed validation as non-abstainers did not change the results much (RR=10.9 to RR=14.0; p=0.02 to p=0.01).

Table 4 shows varenicline use among all participants who started the medication and among those who were abstinent from smoking at three months, by the end of the varenicline use period. Adherence to varenicline treatment was relatively high, with even some of the smokers who failed to quit completely continuing varenicline use for the full three months.

**Table 4: Adherence to varenicline treatment (N, %)**

| Week post-TQD | All v. users (N=80) | Quitters at three months* (N=26) | Non-quitters (N=54) |
|---------------|---------------------|----------------------------------|---------------------|
| 1             | 46 (57.5%)          | 22 (84.6%)                       | 24 (44.4%)          |
| 2             | 41 (51.2%)          | 20 (76.9%)                       | 21 (38.8%)          |
| 3             | 30 (37.5%)          | 16 (61.5%)                       | 14 (25.9%)          |
| 4             | 31 (38.7%)          | 15 (57.6%)                       | 16 (29.6%)          |
| 6             | 23 (28.7%)          | 15 (57.6%)                       | 8 (14.8%)           |
| 8             | 14 (17.5%)          | 8 (30.7%)                        | 6 (11.1%)           |
| 10            | 12 (15.0%)          | 7 (26.9%)                        | 5 (9.2%)            |
| 12            | 19 (24%)            | 9 (35%)                          | 10 (19%)            |

\*no smoking in last 30 days

Table 5 shows changes in enjoyment of vaping and smoking by the end of the varenicline use period at three months in participants who were still using their nicotine products and who provided the ratings. The varenicline group recorded bigger reductions in enjoyment of both smoking and vaping, but this only reached significance for reduced enjoyment of vaping.

**Table 5. Changes in enjoyment of smoking and vaping compared to baseline at three months in participants who still smoked/vaped**

|                                                                   | Used v             | Did not use v      | Difference      |
|-------------------------------------------------------------------|--------------------|--------------------|-----------------|
| Mean difference in enjoyment of <i>vaping</i> from baseline (SD)  | -0.8 (2.2)<br>N=44 | -0.2 (1.5)<br>N=99 | F=4.1<br>p=0.04 |
| Mean difference in enjoyment of <i>smoking</i> from baseline (SD) | -1.2 (2.9)<br>N=27 | -0.5 (2.1)<br>N=90 | F=1.7<br>p=0.19 |

Figures 2 and 3 show changes in cotinine levels in the two groups at 3 and 6 months, respectively. We obtained usable cotinine samples from 135

1  
2  
3 participants at 3 months and 115 at 6 months. Varenicline use was associated  
4 with significantly larger reduction in nicotine intake at both 3 and 6 months  
5 ( $F=13.9$ ,  $p<0.001$  and  $F=26.5$ ,  $p<0.001$ , respectively). Among the  
6 subsamples of participants who continued to smoke, the varenicline group  
7 reduced their nicotine intake while the other group increased it, but the  
8 between group difference was only significant at six months ( $F=17.9$ ,  
9  $p<0.001$ ).  
10  
11  
12

13  
14 **Figure 2: Change from baseline to 3 months in cotinine levels (ng/ml) in**  
15 **participants who used and did not use varenicline**  
16

17  
18 **Figure 3: Change from baseline to 6 months in cotinine levels (ng/ml) in**  
19 **participants who used and did not use varenicline**  
20  
21  
22

23 We obtained usable anabasine samples from 126 participants at 3 months  
24 and 109 at 6 months, but salivary anabasine turned out not be a sensitive  
25 enough marker, with a very narrow range of very low values and a number of  
26 zero readings in participants who reported regular smoking (varenicline users  
27 and non-users had a drop in anabasine levels of 0.5 [SD=1.7] vs 0.3 [SD=1.8]  
28 ng/ml,  $p=0.51$  at 3 months; and 0.3 [SD=2.6] vs 0.1 [SD=2.3] ng/ml,  $p=0.59$  at  
29 6 months).  
30  
31  
32

### 33 Discussion

34  
35  
36 A large proportion of dual users (61%) expressed interest in using varenicline  
37 to help them stop smoking altogether, with 39% starting treatment. Compared  
38 to the rest of the sample, dual users who used varenicline had much higher  
39 rates of quitting smoking as well as quitting vaping.  
40  
41  
42

43 The substantial interest among dual users in using a stop smoking medication  
44 was unexpected. We assumed initially that because dual users opted for EC  
45 in preference to licensed medications (that are offered by the National Health  
46 Service and local stop-smoking services virtually free in the UK), they will  
47 show limited interest in using them. The majority however were interested.  
48 Attempts at health behaviour changes are often characterised by gaps  
49 between intentions and actions and in this case, over a third of those who  
50 initially expressed interest did not progress to the actual use. This however  
51 still left 39% of the sample initiating varenicline treatment.  
52  
53  
54  
55

56 Dual users who started varenicline treatment were heavier smokers with  
57 higher tobacco dependence who were using higher strength nicotine liquids  
58 than the rest of the sample. It seems likely that this subsample was finding  
59 reducing or quitting smoking more difficult than the rest of the cohort, but they  
60

1  
2  
3 may have also been more motivated to do so. A randomised trial would be  
4 needed to control for such variables. It is possible that the effect of varenicline  
5 would be even stronger because the groups would be matched for  
6 dependence, but it could also be weaker if the current results were influenced  
7 by differences in motivation to quit smoking.  
8  
9

10  
11 The difference in quitting nicotine use between participants who did and those  
12 who did not use varenicline was remarkably large (RR=3.6 for stopping  
13 smoking; RR=7.8 for stopping vaping, and RR=6.2 for stopping both for at  
14 least the past three months at the six month follow-up).  
15  
16

17  
18 It was hypothesized that one of the key moderators of the effect of varenicline  
19 on stopping smoking is its effect on reducing urges to smoke (11). We were  
20 unable to monitor withdrawal symptoms in non-varenicline users during the  
21 acute withdrawal phase, but we collected ratings of enjoyment of smoking and  
22 vaping at different time points. At the end of the varenicline use period at  
23 three months, the varenicline group was reporting a significantly greater  
24 reduction in enjoyment of vaping, while the difference in reduction of  
25 enjoyment of smoking did not reach statistical significance. The varenicline  
26 effect on vaping cessation also appeared stronger than its effect on cessation  
27 of smoking. The data tally with the previous findings suggesting that the  
28 medication exerts its influence in part at least by reducing the reward from  
29 nicotine (11).  
30  
31  
32  
33  
34

35 This is further supported by the finding that varenicline use was associated  
36 with a reduction in nicotine intake, indexed by salivary cotinine, at all time  
37 points. An activity that generates less reward can be expected to subside. A  
38 recent trial of nicotine replacement 'preloading' (use of nicotine patches for  
39 four weeks while participants continue to smoke ad-lib) identified the reduction  
40 in urges to smoke before and after stopping smoking and a reduction in  
41 smoke intake as mediators of the treatment effect on abstinence (12, 13). This  
42 tallies closely with the present findings.  
43  
44  
45  
46

47 The finding that the varenicline group showed a reduction in nicotine intake in  
48 non-abstainers at six months is more difficult to interpret. The experience with  
49 varenicline may have had some kind of on-going impact that continued even  
50 after the medication ceased, but this could also be a chance finding.  
51  
52

53 The main limitation of the study is that this was not a randomised comparison.  
54 As discussed above, dual users opting for varenicline may have been more  
55 motivated to stop smoking than others, although interest in stopping smoking  
56 was the inclusion criterion. Participants in the varenicline group also received  
57 weekly support and this could have made them more likely to respond to  
58 follow-up calls and less likely to drop out than the rest of the sample. This  
59  
60



1  
2  
3 however was not the case, the follow-up rates were in fact slightly higher in  
4 the non-varenicline group. The weekly support calls may have boosted the  
5 quit rate in the varenicline group, although telephone support on its own has  
6 been shown to have only modest long-term effects (14). We were able to  
7 validate smoking status in people who claimed to have stopped both smoking  
8 and vaping via salivary cotinine, but salivary anabasine turned out not be an  
9 accurate enough measure. In dual users, nicotine and its metabolites cannot  
10 be used to verify abstinence from smoking, but future studies may consider  
11 using urinary index of exposure to tobacco-specific nitrosamine NNK for this  
12 purpose (15). With no biochemical confirmation of abstinence from smoking in  
13 EC users, the study relied on self-reports and this could have introduced a  
14 bias, although we did detect significant differences between the groups in  
15 cotinine levels. Another possible source of bias that may have affected our  
16 results is that only the varenicline group set up a formal quit date. This would  
17 have a major influence on the usual indicators of sustained abstinence rates  
18 timed from the TQD because only one group was asked to quit on that day.  
19 The varenicline effect however was also present when looking at abstinence  
20 during months three to six, and also when looking at abstinence for just the  
21 past seven days at six months. In the sample of people intending to stop  
22 smoking, such measures that are not linked to an early quit date should be  
23 less vulnerable to any such effect. The issue of having or not having TQD  
24 could be also expected to have little impact on EC use because participants  
25 were not asked to stop or reduce vaping. The fact that varenicline use was  
26 associated with a similar effect size with regard to quitting vaping mitigates  
27 the concern. Loss to follow-up represents another study limitation. Finally, this  
28 was not a random sample. Recruitment via social media may have attracted a  
29 sample with characteristics that are not representative of the wider population  
30 of dual users and the generalisability of the results is thus unclear.  
31  
32  
33  
34  
35  
36  
37  
38  
39  
40

41  
42 In summary, varenicline offered to dual users is likely to promote successful  
43 abstinence from both smoking and vaping, although a randomised trial is  
44 needed to confirm the finding. Among dual users who intend to stop smoking  
45 altogether, there seems to be a high level of interest in smoking cessation  
46 treatments.  
47  
48

### 49 **Contributions**

50 All authors (PH, DP, SP, APW, CS, KP) contributed to the planning and  
51 conduct of the work, and DP, PH, KP, and SP contributed to the reporting of  
52 the work. PH and DP are responsible for the overall content as guarantors.  
53 The guarantors accept full responsibility for the work and/or the conduct of the  
54 study, had access to the data, and controlled the decision to publish. The  
55 corresponding author attests that all listed authors meet authorship criteria  
56 and that no others meeting the criteria have been omitted.  
57  
58  
59

### 60 **Competing Interests**



1  
2  
3 All authors declare: support from Pfizer for the work; no financial relationships  
4 with any organisations that might have an interest in the submitted work in the  
5 previous three years; and PH has provided consultancy to manufacturers of  
6 stop-smoking medications.  
7

### 8 9 **Funding**

10 The study was funded by an investigator-initiated grant from Pfizer. The  
11 funder was not involved in the study design, conduct, or data analysis.  
12

### 13 14 **Data Sharing**

15 Data is available upon request from the corresponding author.  
16  
17  
18  
19  
20  
21  
22  
23  
24  
25  
26  
27  
28  
29  
30  
31  
32  
33  
34  
35  
36  
37  
38  
39  
40  
41  
42  
43  
44  
45  
46  
47  
48  
49  
50  
51  
52  
53  
54  
55  
56  
57  
58  
59  
60

For peer review only

## References

1. PATEL D., DAVIS K. C., COX S., BRADFIELD B., KING B. A., SHAFER P. et al. Reasons for current E-cigarette use among US adults, *Preventive medicine* 2016: 93: 14-20.
2. ETTER J. F. Electronic cigarettes: a survey of users, *BMC Public Health* 2010: 10: 231.
3. ETTER J. F., BULLEN C. Electronic cigarette: users profile, utilization, satisfaction and perceived efficacy, *Addiction* 2011: 106: 2017-2028.
4. SCHOREN C., HUMMEL K., VRIES H. D. Electronic cigarette use: comparing smokers, vapers, and dual users on characteristics and motivational factors, *Tobacco Prevention & Cessation* 2017: 3.
5. COOPER M., CASE K. R., LOUKAS A., CREAMER M. R., PERRY C. L. E-cigarette dual users, exclusive users and perceptions of tobacco products, *American journal of health behavior* 2016: 40: 108-116.
6. ADRIAENS K., VAN GUCHT D., BAEYENS F. Differences between Dual Users and Switchers Center around Vaping Behavior and Its Experiences Rather than Beliefs and Attitudes, *International journal of environmental research and public health* 2017: 15: 12.
7. POKHREL P., HERZOG T. A., MURANAKA N., REGMI S., FAGAN P. Contexts of cigarette and e-cigarette use among dual users: a qualitative study, *BMC public health* 2015: 15: 859.
8. RASS O., PACEK L. R., JOHNSON P. S., JOHNSON M. W. Characterizing use patterns and perceptions of relative harm in dual users of electronic and tobacco cigarettes, *Experimental and clinical psychopharmacology* 2015: 23: 494.
9. MAGLIA M., CAPONNETTO P., DI PIAZZA J., LA TORRE D., POLOSA R. Dual use of electronic cigarettes and classic cigarettes: a systematic review, *Addiction Research & Theory* 2017: 1-9.
10. FAGERSTRÖM K. Determinants of tobacco use and renaming the FTND to the Fagerström Test for Cigarette Dependence, *Nicotine & Tobacco Research* 2011: 14: 75-78.
11. HAJEK P., MCROBBIE H. J., MYERS K. E., STAPLETON J., DHANJI A.-R. Use of varenicline for 4 weeks before quitting smoking: decrease in ad lib smoking and increase in smoking cessation rates, *Archives of internal medicine* 2011: 171: 770-777.
12. INVESTIGATORS P. Effects on abstinence of nicotine patch treatment before quitting smoking: parallel, two arm, pragmatic randomised trial, *Bmj* 2018: 361: k2164.
13. INVESTIGATORS. P. Mediators of the effect of nicotine pre-treatment on quitting smoking. *Addiction* (in press). 2018.
14. STEAD L. F., PERERA R., LANCASTER T. Telephone counselling for smoking cessation, *Cochrane Database Syst Rev* 2006: 3.
15. GONIEWICZ M. L., SMITH D. M. Are Some E-Cigarette Users “Blowing Smoke”? Assessing the Accuracy of Self-Reported Smoking Abstinence in Exclusive E-Cigarette Users, *Nicotine & Tobacco Research* 2018: nty085-nty085.

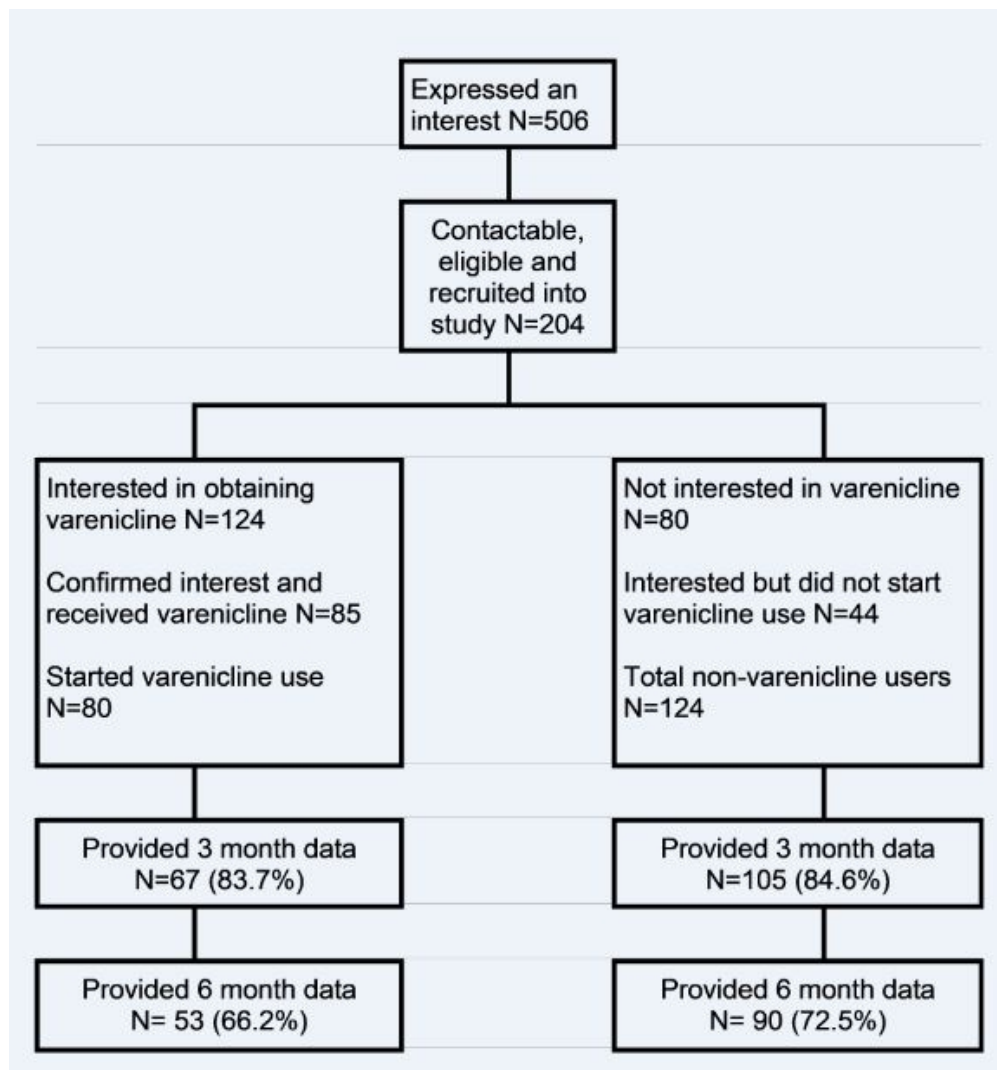

Figure 1: Participant flow chart

48x52mm (300 x 300 DPI)

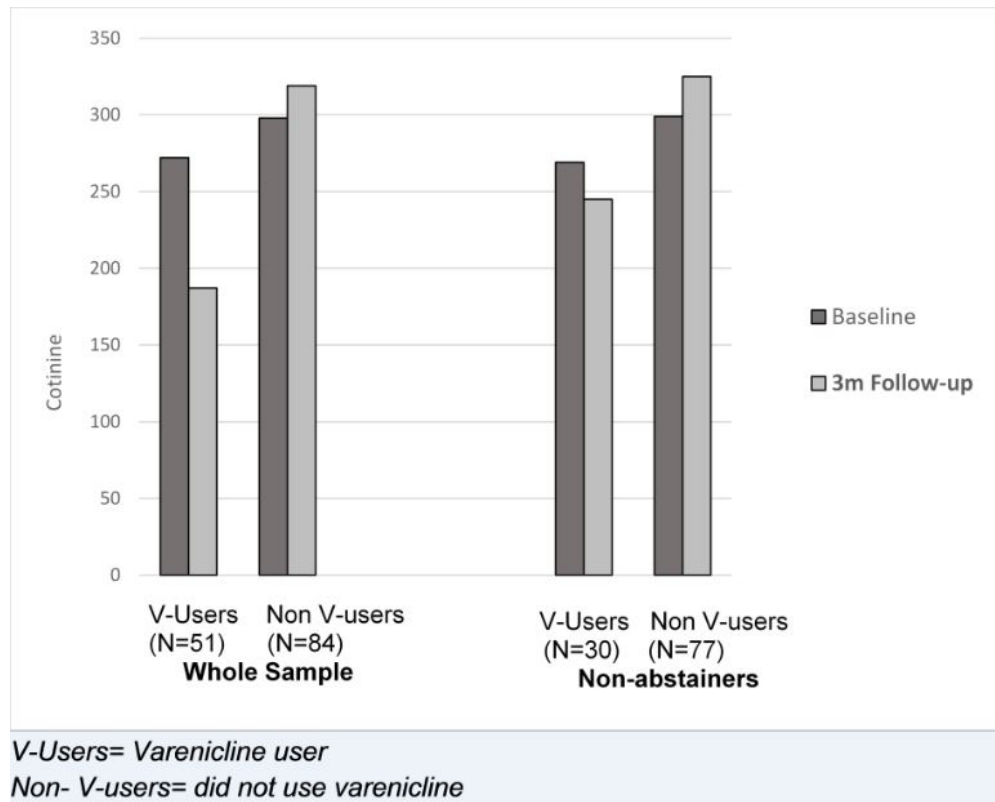

Figure 2: Change from baseline to 3 months in cotinine levels (ng/ml) in participants who used and did not use varenicline

65x52mm (300 x 300 DPI)

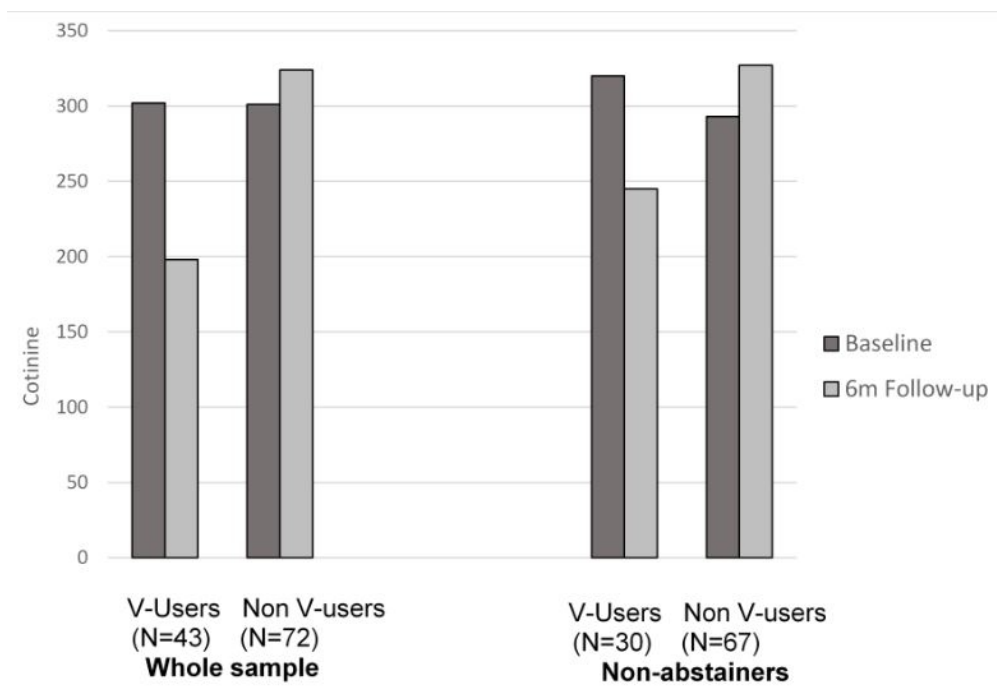

*V-Users= Varenicline user*  
*Non- V-users= did not use varenicline*

Figure 3: Change from baseline to 6 months in cotinine levels (ng/ml) in participants who used and did not use varenicline

66x52mm (300 x 300 DPI)

1 STROBE Statement—Checklist of items that should be included in reports of *cohort studies*

|                              | Item No | Recommendation                                                                                                                                                                                        |
|------------------------------|---------|-------------------------------------------------------------------------------------------------------------------------------------------------------------------------------------------------------|
| <b>Title and abstract</b>    | 1       | (a) Indicate the study's design with a commonly used term in the title or the abstract<br><b>Page 1</b>                                                                                               |
|                              |         | (b) Provide in the abstract an informative and balanced summary of what was done and what was found<br><b>Page 2</b>                                                                                  |
| <b>Introduction</b>          |         |                                                                                                                                                                                                       |
| Background/rationale         | 2       | Explain the scientific background and rationale for the investigation being reported<br><b>Page 3</b>                                                                                                 |
| Objectives                   | 3       | State specific objectives, including any prespecified hypotheses<br><b>Page 3</b>                                                                                                                     |
| <b>Methods</b>               |         |                                                                                                                                                                                                       |
| Study design                 | 4       | Present key elements of study design early in the paper<br><b>Page 3</b>                                                                                                                              |
| Setting                      | 5       | Describe the setting, locations, and relevant dates, including periods of recruitment, exposure, follow-up, and data collection<br><b>Page 3-4</b>                                                    |
| Participants                 | 6       | (a) Give the eligibility criteria, and the sources and methods of selection of participants. Describe methods of follow-up<br><b>Page 4</b>                                                           |
|                              |         | (b) For matched studies, give matching criteria and number of exposed and unexposed<br><b>N/A</b>                                                                                                     |
| Variables                    | 7       | Clearly define all outcomes, exposures, predictors, potential confounders, and effect modifiers. Give diagnostic criteria, if applicable<br><b>Page 5-6</b>                                           |
| Data sources/<br>measurement | 8*      | For each variable of interest, give sources of data and details of methods of assessment (measurement). Describe comparability of assessment methods if there is more than one group<br><b>Page 5</b> |
| Bias                         | 9       | Describe any efforts to address potential sources of bias<br><b>N/A</b>                                                                                                                               |
| Study size                   | 10      | Explain how the study size was arrived at<br><b>Page 5-6</b>                                                                                                                                          |
| Quantitative<br>variables    | 11      | Explain how quantitative variables were handled in the analyses. If applicable, describe which groupings were chosen and why<br><b>Page 5-6</b>                                                       |
| Statistical methods          | 12      | (a) Describe all statistical methods, including those used to control for confounding<br><b>Page 5-6</b>                                                                                              |
|                              |         | (b) Describe any methods used to examine subgroups and interactions<br><b>Page 6</b>                                                                                                                  |
|                              |         | (c) Explain how missing data were addressed<br><b>Page 6</b>                                                                                                                                          |
|                              |         | (d) If applicable, explain how loss to follow-up was addressed<br><b>Page 6</b>                                                                                                                       |
|                              |         | (e) Describe any sensitivity analyses<br><b>Page 6</b>                                                                                                                                                |

| <b>Results</b>           |     |                                                                                                                                                                                                                                         |
|--------------------------|-----|-----------------------------------------------------------------------------------------------------------------------------------------------------------------------------------------------------------------------------------------|
| Participants             | 13* | (a) Report numbers of individuals at each stage of study—eg numbers potentially eligible, examined for eligibility, confirmed eligible, included in the study, completing follow-up, and analysed<br><a href="#">Figure 1</a>           |
|                          |     | (b) Give reasons for non-participation at each stage<br><a href="#">Figure 1 and page 6</a>                                                                                                                                             |
|                          |     | (c) Consider use of a flow diagram<br><a href="#">Figure 1</a>                                                                                                                                                                          |
| Descriptive data         | 14* | (a) Give characteristics of study participants (eg demographic, clinical, social) and information on exposures and potential confounders<br><a href="#">Table 2</a>                                                                     |
|                          |     | (b) Indicate number of participants with missing data for each variable of interest<br><a href="#">Figure 1 (shows N providing data)</a>                                                                                                |
|                          |     | (c) Summarise follow-up time (eg, average and total amount)<br><a href="#">Page 5 and Table 1</a>                                                                                                                                       |
| Outcome data             | 15* | Report numbers of outcome events or summary measures over time<br><a href="#">Page 5 and Table 1</a>                                                                                                                                    |
| Main results             | 16  | (a) Give unadjusted estimates and, if applicable, confounder-adjusted estimates and their precision (eg, 95% confidence interval). Make clear which confounders were adjusted for and why they were included<br><a href="#">Table 3</a> |
|                          |     | (b) Report category boundaries when continuous variables were categorized<br><a href="#">N/A</a>                                                                                                                                        |
|                          |     | (c) If relevant, consider translating estimates of relative risk into absolute risk for a meaningful time period<br><a href="#">N/A</a>                                                                                                 |
| Other analyses           | 17  | Report other analyses done—eg analyses of subgroups and interactions, and sensitivity analyses<br><a href="#">Tables 4-5, Figures 2-3, pages 9-10</a>                                                                                   |
| <b>Discussion</b>        |     |                                                                                                                                                                                                                                         |
| Key results              | 18  | Summarise key results with reference to study objectives<br><a href="#">Page 10</a>                                                                                                                                                     |
| Limitations              | 19  | Discuss limitations of the study, taking into account sources of potential bias or imprecision. Discuss both direction and magnitude of any potential bias<br><a href="#">Page 11-12</a>                                                |
| Interpretation           | 20  | Give a cautious overall interpretation of results considering objectives, limitations, multiplicity of analyses, results from similar studies, and other relevant evidence<br><a href="#">Page 10-12</a>                                |
| Generalisability         | 21  | Discuss the generalisability (external validity) of the study results<br><a href="#">Page 12</a>                                                                                                                                        |
| <b>Other information</b> |     |                                                                                                                                                                                                                                         |
| Funding                  | 22  | Give the source of funding and the role of the funders for the present study and, if applicable, for the original study on which the present article is based<br><a href="#">Page 1</a>                                                 |

\*Give information separately for exposed and unexposed groups.

1  
2 **Note:** An Explanation and Elaboration article discusses each checklist item and gives methodological background and  
3 published examples of transparent reporting. The STROBE checklist is best used in conjunction with this article (freely  
4 available on the Web sites of PLoS Medicine at <http://www.plosmedicine.org/>, Annals of Internal Medicine at  
5 <http://www.annals.org/>, and Epidemiology at <http://www.epidem.com/>). Information on the STROBE Initiative is  
6 available at <http://www.strobe-statement.org>.  
7  
8  
9  
10  
11  
12  
13  
14  
15  
16  
17  
18  
19  
20  
21  
22  
23  
24  
25  
26  
27  
28  
29  
30  
31  
32  
33  
34  
35  
36  
37  
38  
39  
40  
41  
42  
43  
44  
45  
46  
47  
48  
49  
50  
51  
52  
53  
54  
55  
56  
57  
58  
59  
60

For peer review only
